# Supplementary material for: Gold Nanoclusters Dispersed on Gold Dendrite-Based Carbon Fibre Microelectrodes for the Sensitive Detection of Nitric Oxide in Human Serum
Source: MDPI journal article supplement (doi:10.3390/bios12121128), 2022-12-05
Supplement: s1 [file s1]

## Supporting Information

### **Gold Nanoclusters Dispersed on Gold Dendrites based Carbon-Fibres Microelectrodes for the Sensitive Detection of Nitric Oxide in Human Serum**

Mani Arivazhagan and Govindhan Maduraiveeran\*

Materials Electrochemistry Laboratory, Department of Chemistry, SRM Institute of Science and Technology, Kattankulathur 603 203, Tamil Nadu, India

\*Corresponding Author E-mail: [maduraig@srmist.edu.in](mailto:maduraig@srmist.edu.in)

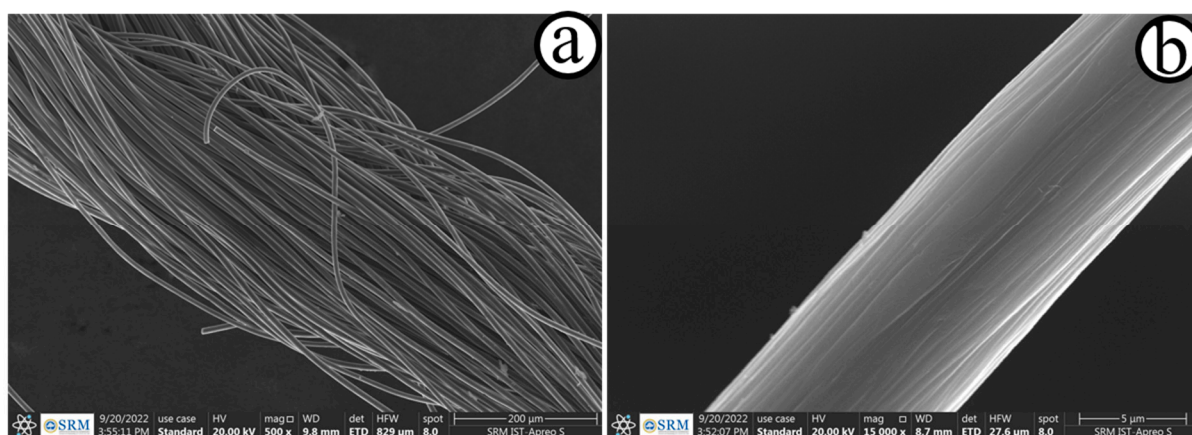

**Figure S1.** FE-SEM images of the bare carbon-fibres microelectrode (a & b).

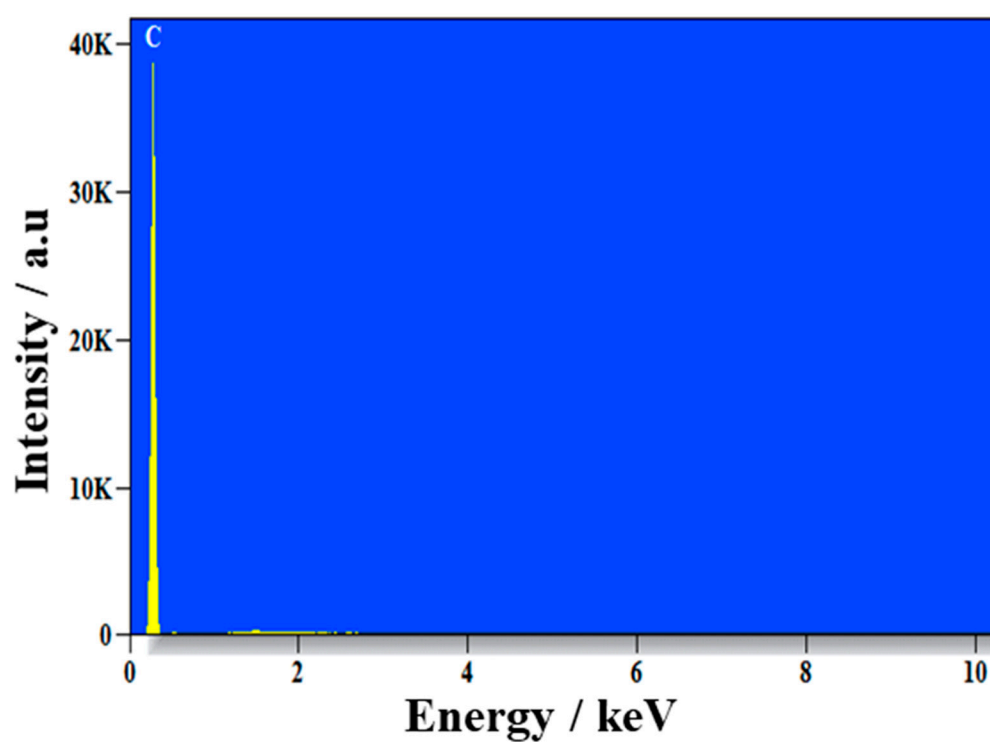

**Figure S2.** EDX spectrum of the bare carbon-fibres microelectrode.

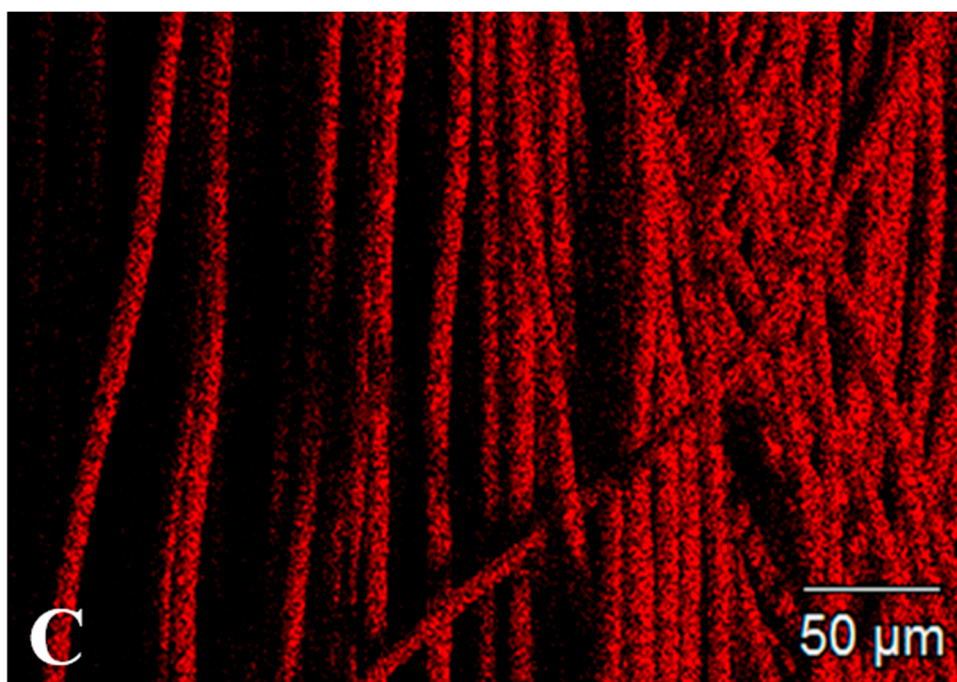

**Figure S3.** Elemental mapping of the bare carbon-fibres microelectrode.

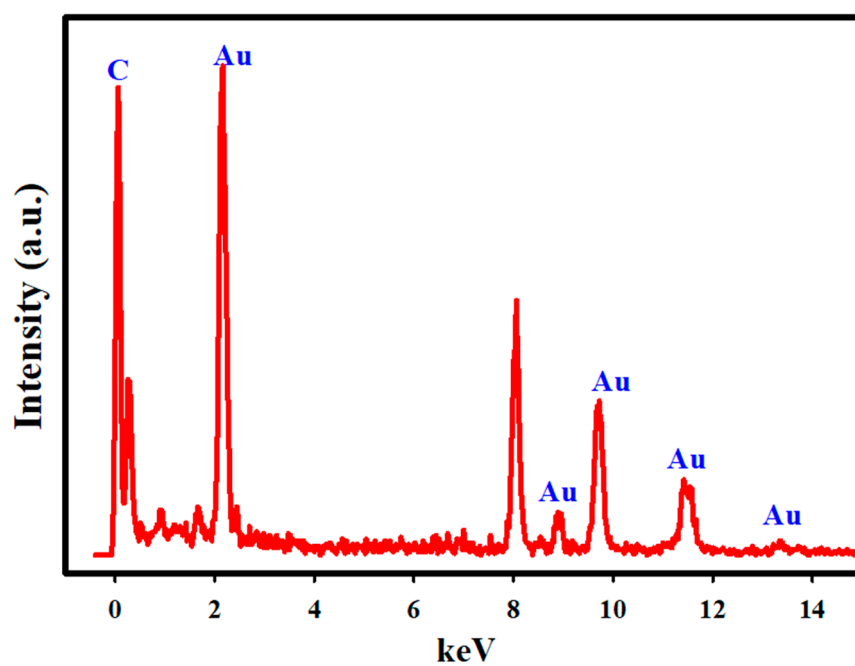

**Figure S4.** EDX spectra for AuNC@AuDS|CF microelectrodes from TEM measurements.

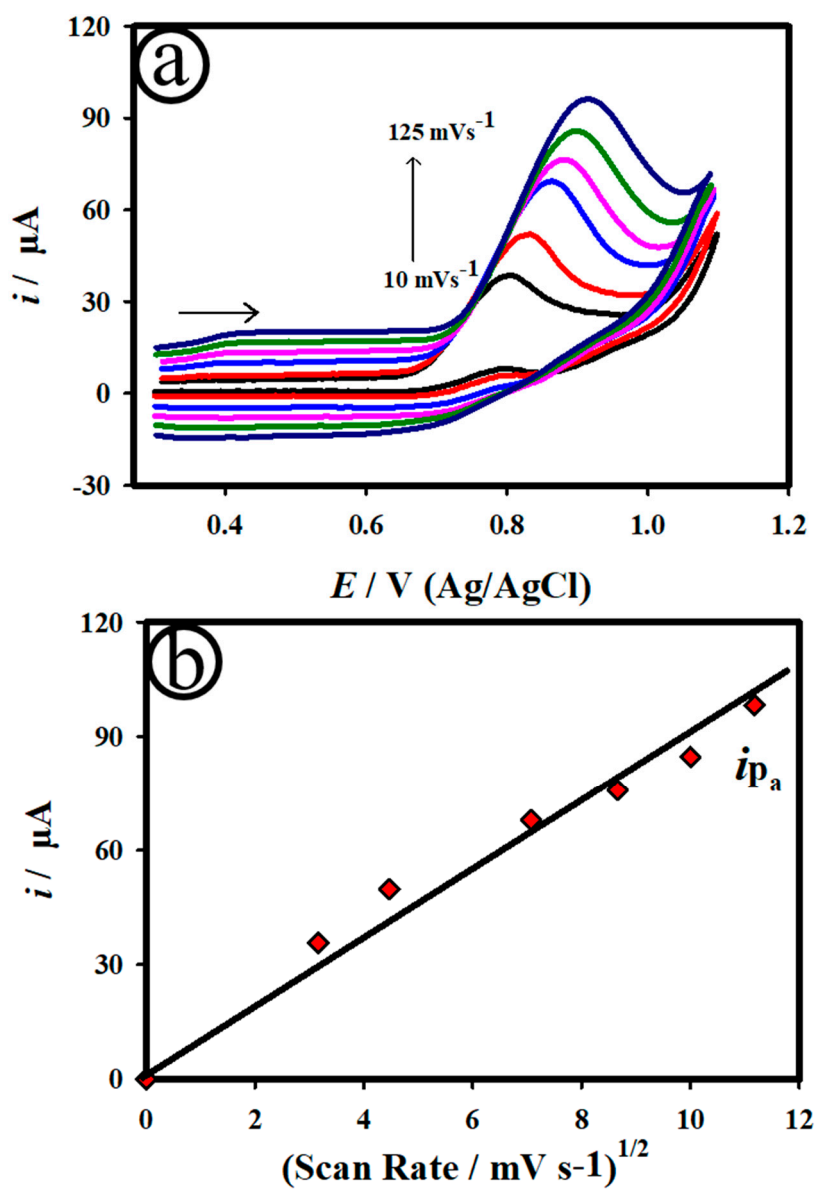

**Figure S5.** CV curves of the AuNC@AuDS|CF microelectrode recorded for 50.0  $\mu\text{M}$   $\text{NO}_2^-$  in 0.1 M PB at different scan rates (a). The corresponding plot of anodic currents against the square root of scan rates (b).

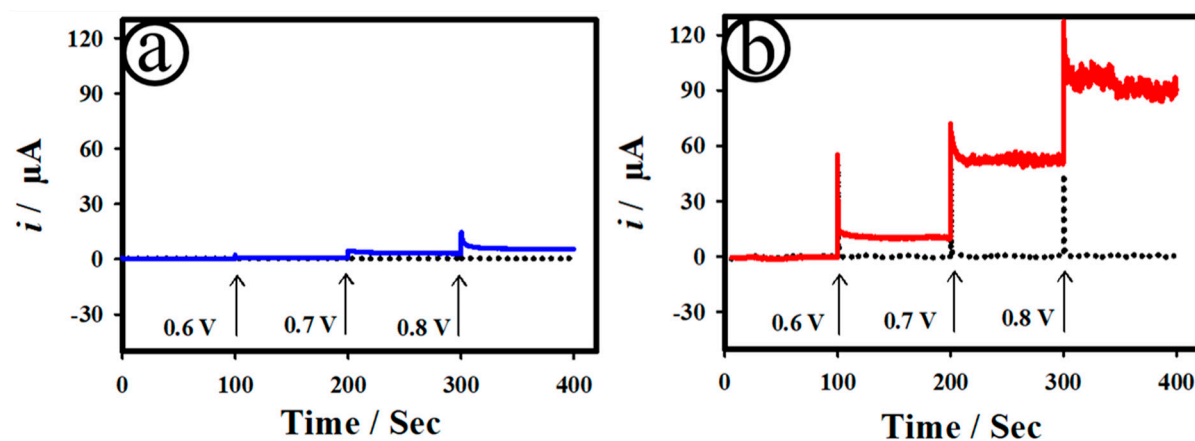

**Figure S6.** Chronoamperometric  $i-t$  curves of the bare CF (c) and AuNC@AuDS/CF (d) microelectrodes recorded in the nonexistence (dotted curve) and existence (solid curve) of  $50.0 \mu\text{M NO}_2^-$  in  $0.1 \text{ M PB}$  at different applied constant potentials.

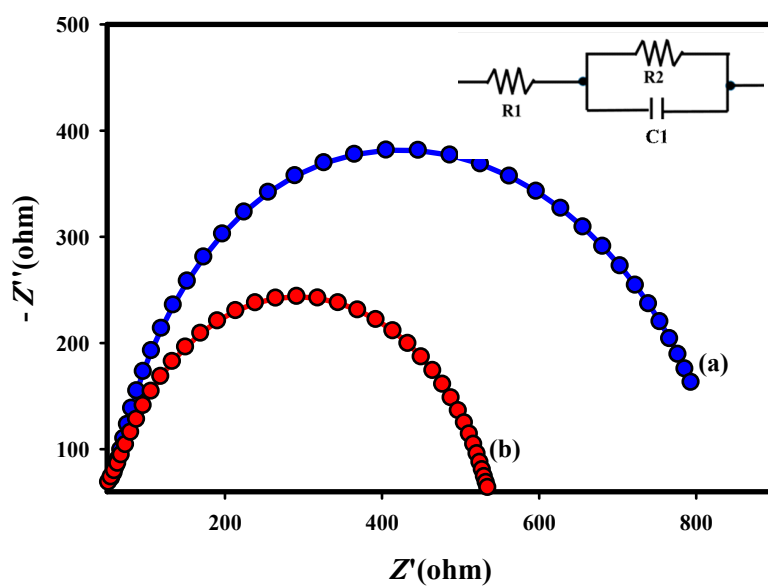

**Figure S7.** The Nyquist curves of the bare CF (a) and AuNC@AuDS|CF microelectrodes (b) recorded for 50.0  $\mu\text{M}$   $\text{NO}_2^-$  in 0.1 M PB.

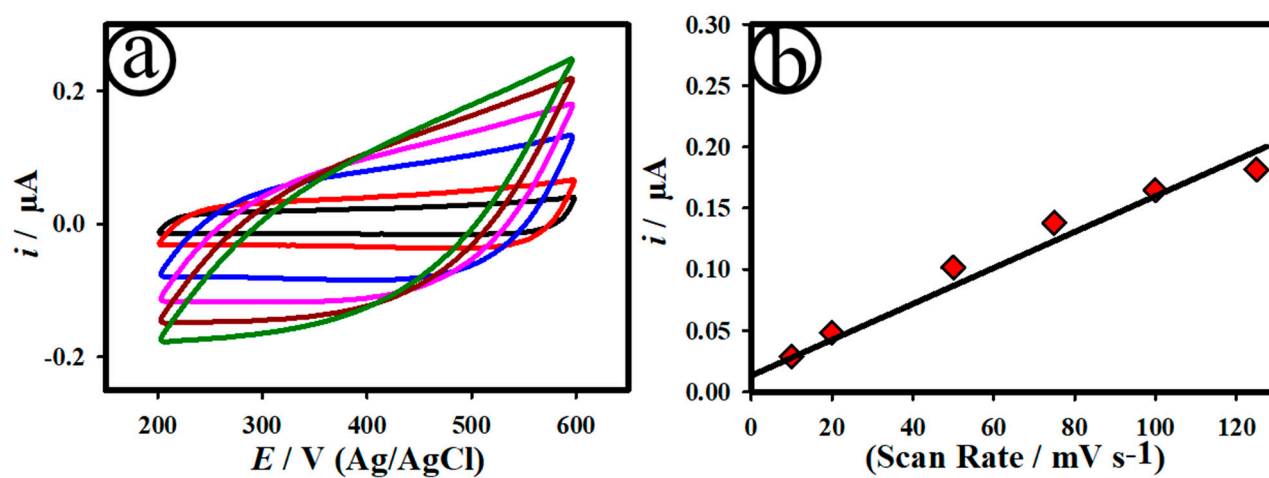

**Figure S8.** (a) CV curves of the bare CF microelectrodes recorded in 0.1 M PB at different scan rates, starting from 10 to 125  $\text{mVs}^{-1}$ . (b) Corresponding plot of anodic double layer currents against the scan rates.



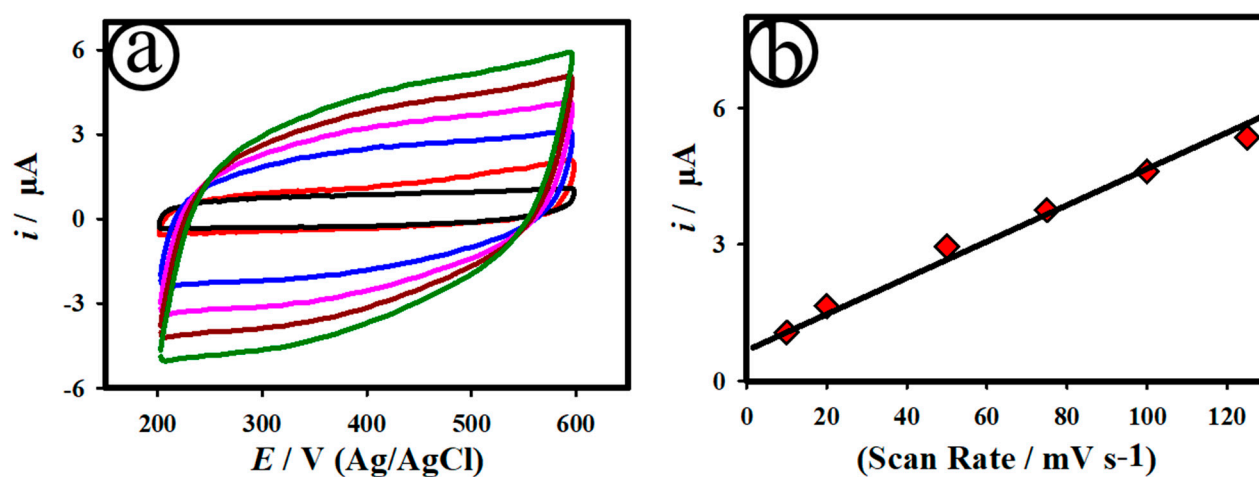

**Figure S9.** (a) CV curves of the AuNC@AuDS|CF microelectrodes recorded in 0.1 M PB at different scan rates, starting from 10 to 125  $\text{mVs}^{-1}$ . (b) Corresponding plot of anodic double layer currents against the scan rates.

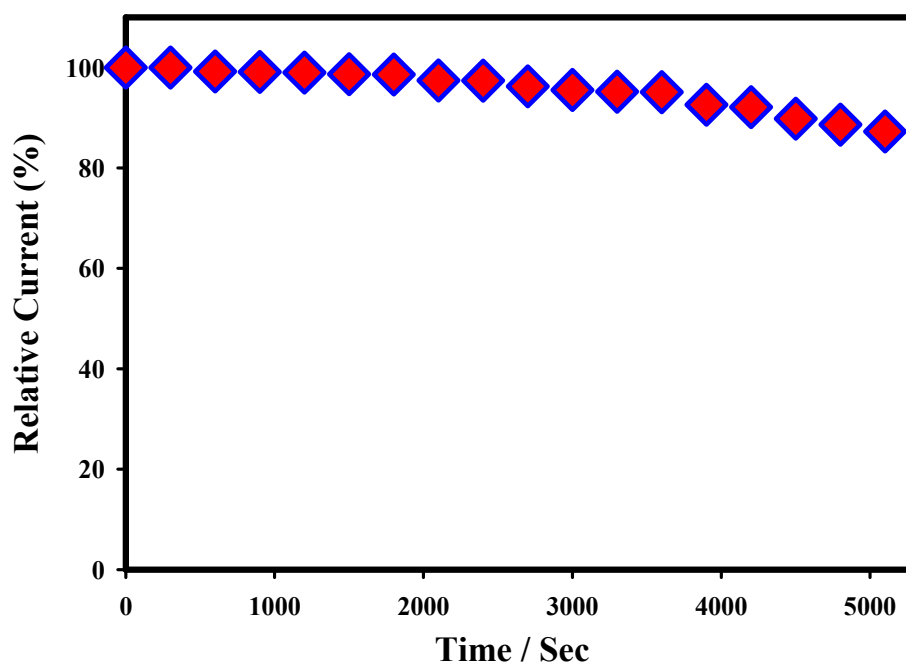

**Figure S10.** Plot of relative catalytic of NO oxidation against time at the AuNC@AuDS|CF microelectrodes in 50  $\mu\text{M}$   $\text{NO}_2^-$  + 0.1M PB in human serum samples for 5000 sec ( $E_{\text{app}}$ : 0.8 V).

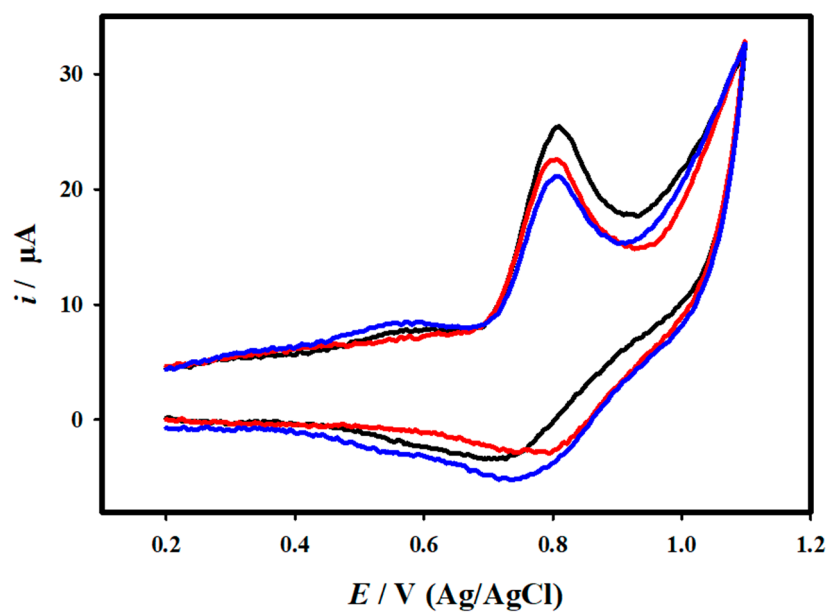

**Figure S11.** CV curves of the three-brand new AuNC@AuDS|CF microelectrodes recorded for 50  $\mu\text{M NO}_2^-$  0.1M PB at a scan rate of 20.0  $\text{mV s}^{-1}$ .
